# Supplementary material
Source: PubMed Central journal article supplement (PMC6165790)
Supplement: 2017.185868.MATO_SUPPL.pdf [file 2017.185868.MATO_SUPPL.pdf]

**Real-world treatment and outcomes among older adults with chronic lymphocytic leukemia before the novel agents era**

---

*Anthony Mato,<sup>1</sup> Jordan Jahnke,<sup>2</sup> Pengxiang Li,<sup>2,3</sup> Maneesha Mehra,<sup>4</sup> Vrushabh P. Ladage,<sup>2</sup> Michelle Mahler,<sup>5</sup> Scott Huntington<sup>6</sup> and Jalpa A. Doshi<sup>2,3</sup>*

*<sup>1</sup>Memorial Sloan Kettering Cancer Center, New York, NY; <sup>2</sup>Division of General Internal Medicine, University of Pennsylvania, Philadelphia, PA; <sup>3</sup>Leonard Davis Institute of Health Economics, Philadelphia, PA; <sup>4</sup>Janssen Global Services, LLC, Raritan, NJ; <sup>5</sup>Janssen Research & Development, Raritan, NJ and <sup>6</sup>Department of Internal Medicine, Yale School of Medicine, New Haven, CT, USA*

*Correspondence: [jdoshi@penmedicine.upenn.edu](mailto:jdoshi@penmedicine.upenn.edu)  
doi:10.3324/haematol.2017.185868*

## Appendix

**Appendix Table 1. FDA-Approved Drugs for Chronic Lymphocytic Leukemia Included in the Study**

|    | <b>Generic Name</b> | <b>Brand Name</b> | <b>Route(s) of Administration</b> | <b>Medicare Coverage</b> | <b>First FDA Approval Date</b> |
|----|---------------------|-------------------|-----------------------------------|--------------------------|--------------------------------|
| 1  | alemtuzumab         | Campath           | IV                                | B                        | May 2001                       |
| 2  | bendamustine        | Treanda           | IV                                | B/D                      | October 2008                   |
| 3  | chlorambucil        | Luekeran          | Oral                              | D                        | March 1957                     |
| 4  | cladribine          | Leustatin         | IV                                | B                        | February 1993                  |
| 5  | cyclophosphamide    | Cytoxan           | IV/Oral                           | B/D                      | November 1959                  |
| 6  | cytarabine          | Depocyt           | IV                                | B                        | August 1999                    |
| 7  | doxorubicin         | Doxil             | IV                                | B                        | June 1999                      |
| 8  | fludarabine         | Fludara           | IV                                | B                        | April 1991                     |
| 9  | ibrutinib           | Impruvica         | Oral                              | D                        | November 2013                  |
| 10 | idelalisib          | Zydelig           | Oral                              | D                        | July 2014                      |
| 11 | lenalidomide        | Revlimid          | Oral                              | D                        | October 2005                   |
| 12 | obinutuzumab        | Gazyva            | IV                                | B                        | November 2013                  |
| 13 | ofatumumab          | Arzerra           | IV                                | B                        | October 2009                   |
| 14 | oxaliplatin         | Eloxatin          | IV                                | B                        | August 2002                    |
| 15 | pentostatin         | Nipent            | IV                                | B                        | October 1991                   |
| 16 | rituximab           | Rituxan           | IV                                | B                        | November 1997                  |
| 17 | vincristine         | Oncovin           | IV                                | B                        | July 1963                      |

**Appendix Figure 1. Sample Selection Flowchart**

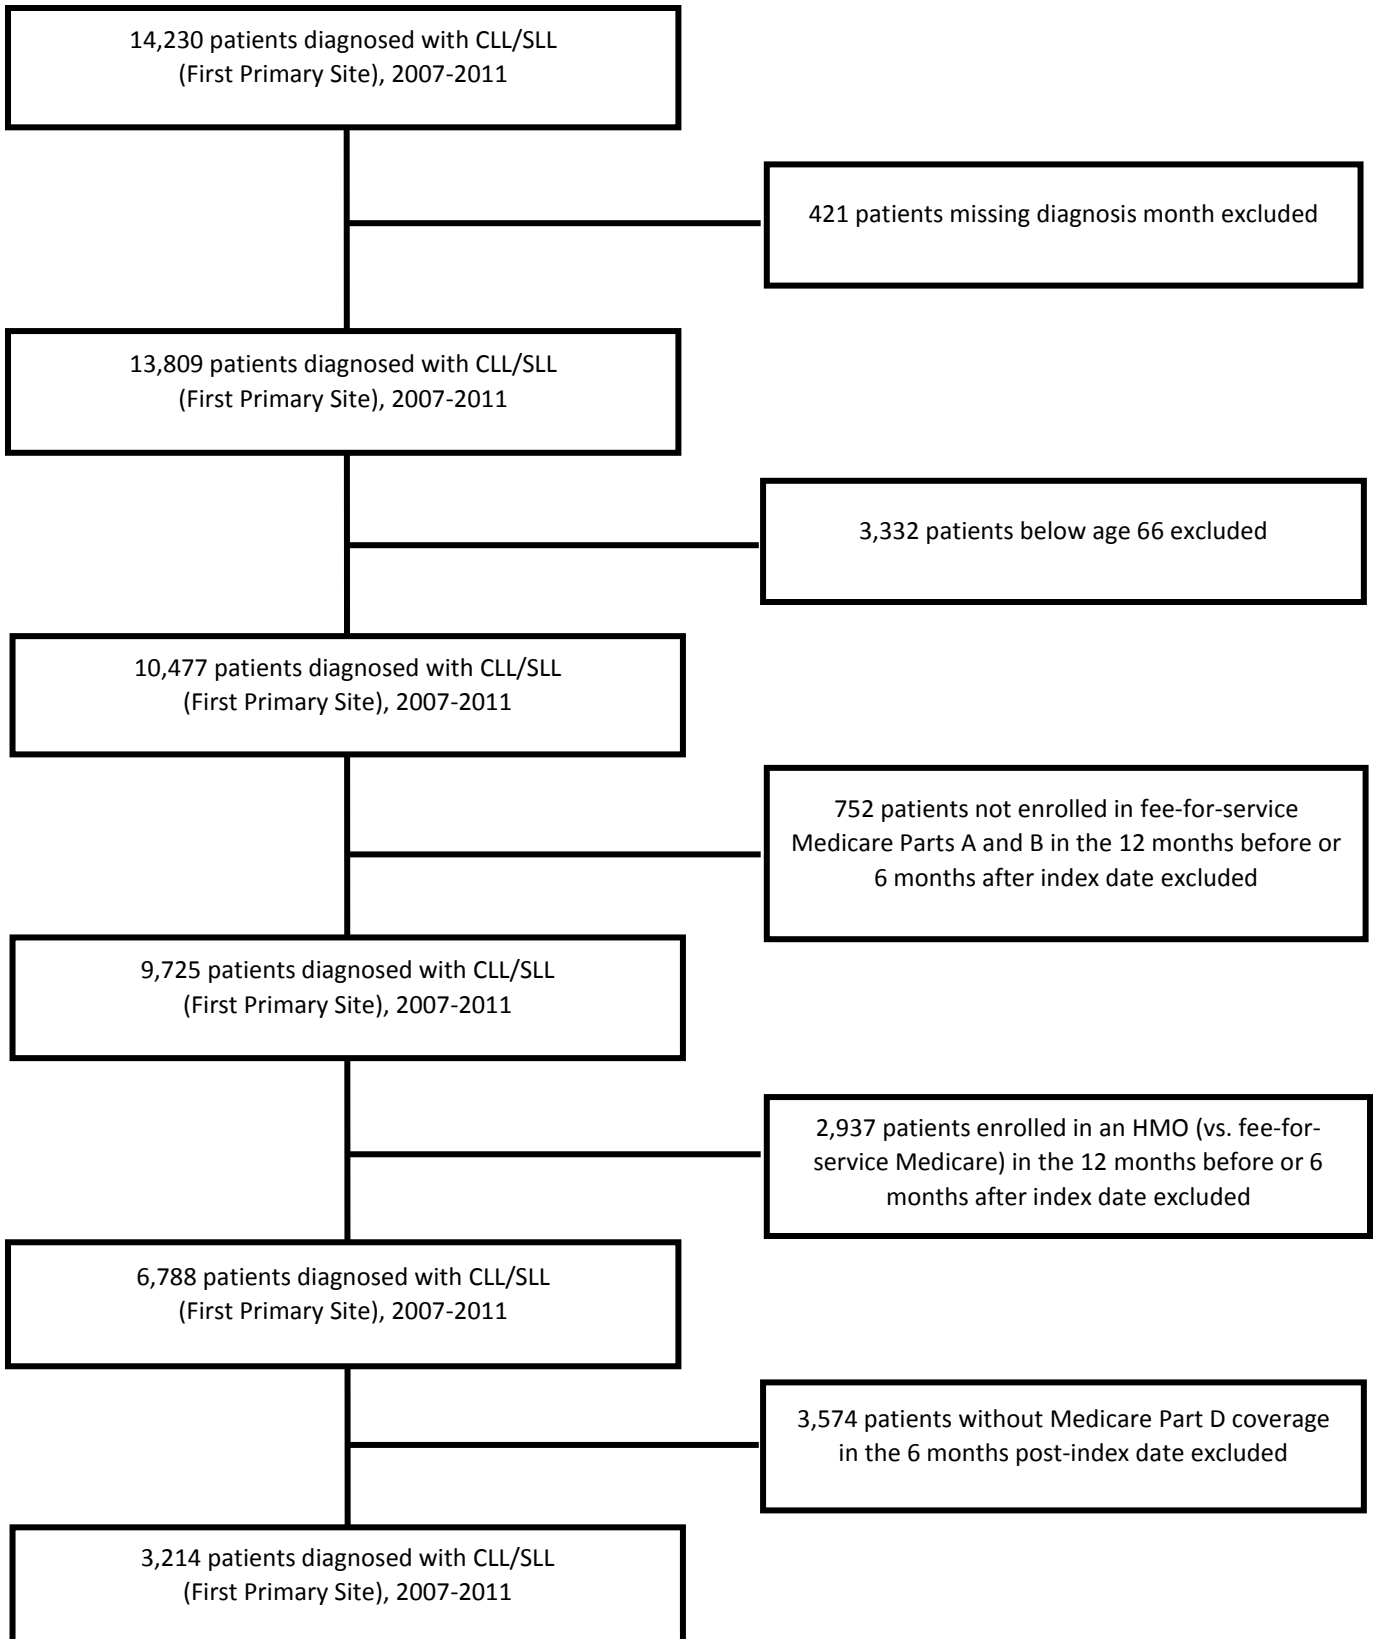

**Appendix Table 2. Sample Characteristics for Elderly Medicare Patients Newly Diagnosed with Chronic Lymphocytic Leukemia, by Age Group**

| Characteristic                   | All CLL patients<br>(N = 3,214) |      | Age <75<br>(n = 1,243) |      | Age ≥75<br>(n = 1,971) |      | P     |
|----------------------------------|---------------------------------|------|------------------------|------|------------------------|------|-------|
|                                  | n                               | %    | n                      | %    | n                      | %    |       |
| Age, mean (SD)                   | 78.0                            | 8.0  | 70.0                   | 2.6  | 83.0                   | 5.7  |       |
| Male                             | 1,567                           | 48.8 | 706                    | 56.8 | 861                    | 43.2 | <.001 |
| Race                             |                                 |      |                        |      |                        |      | .547  |
| White                            | 2,873                           | 89.4 | 1,106                  | 89.0 | 1,767                  | 89.7 |       |
| Non-white                        | 341                             | 10.6 | 137                    | 11.0 | 204                    | 10.4 |       |
| Region                           |                                 |      |                        |      |                        |      | <.001 |
| Northeast                        | 725                             | 22.6 | 238                    | 19.2 | 487                    | 24.7 |       |
| Midwest                          | 434                             | 13.5 | 156                    | 12.6 | 278                    | 14.1 |       |
| South                            | 779                             | 24.2 | 311                    | 25.0 | 468                    | 23.7 |       |
| West                             | 1,276                           | 39.7 | 538                    | 42.2 | 738                    | 37.4 |       |
| Part D Low-Income Subsidy status |                                 |      |                        |      |                        |      | .003  |
| None                             | 2,306                           | 71.7 | 929                    | 74.7 | 1,377                  | 69.9 |       |
| Full or Partial                  | 908                             | 27.2 | 314                    | 25.3 | 594                    | 30.1 |       |
| Specific comorbidities           |                                 |      |                        |      |                        |      |       |
| Anemia/thrombocytopenia          | 964                             | 30.0 | 295                    | 23.7 | 669                    | 33.9 | <.001 |
| Cognitive                        | 758                             | 23.6 | 237                    | 19.1 | 521                    | 26.4 | <.001 |
| Cardiovascular                   | 2,609                           | 81.2 | 943                    | 75.9 | 1,666                  | 84.5 | <.001 |
| Infection                        | 329                             | 10.2 | 96                     | 7.7  | 233                    | 11.8 | <.001 |
| Musculoskeletal                  | 1,034                           | 32.2 | 362                    | 29.1 | 672                    | 34.1 | .003  |
| Renal failure                    | 175                             | 5.4  | 53                     | 4.3  | 122                    | 6.2  | .019  |
| NCI comorbidity index, mean (SD) | 0.79                            | 1.2  | 0.65                   | 1.1  | 0.87                   | 1.3  | <.001 |
| Claims-based disability status*  | 500                             | 15.6 | 102                    | 8.2  | 398                    | 12.4 | <.001 |
| Year of CLL diagnosis            |                                 |      |                        |      |                        |      | .289  |
| 2007                             | 648                             | 20.2 | 250                    | 20.1 | 398                    | 20.1 |       |
| 2008                             | 684                             | 21.3 | 253                    | 20.4 | 431                    | 20.4 |       |
| 2009                             | 662                             | 20.6 | 242                    | 19.5 | 420                    | 19.5 |       |
| 2010                             | 640                             | 19.9 | 255                    | 20.5 | 385                    | 20.5 |       |
| 2011                             | 580                             | 18.0 | 243                    | 19.6 | 337                    | 19.6 |       |

\*Claims-based prediction for disability status, a proxy measure for the Eastern Cooperative Oncology Group (ECOG) performance status scale

**Appendix Table 3. Characteristics of Medicare Patients Newly Diagnosed with Chronic Lymphocytic Leukemia, by Treatment Status**

| Characteristics                                     | All CLL Patients<br>(N = 3,214) |      | CLL Patients Initiating First-Line Treatment (n = 1,047) |      | CLL Patients Initiating Second-Line Treatment (n = 387) |      |
|-----------------------------------------------------|---------------------------------|------|----------------------------------------------------------|------|---------------------------------------------------------|------|
|                                                     | n                               | %    | n                                                        | %    | n                                                       | %    |
| <b>Age</b>                                          |                                 |      |                                                          |      |                                                         |      |
| <75 years                                           | 1,243                           | 38.6 | 476                                                      | 45.5 | 176                                                     | 45.5 |
| ≥75 years                                           | 1,971                           | 61.4 | 571                                                      | 54.5 | 211                                                     | 54.5 |
| <b>Gender, male</b>                                 | 1,567                           | 48.8 | 541                                                      | 51.7 | 187                                                     | 48.3 |
| <b>Race</b>                                         |                                 |      |                                                          |      |                                                         |      |
| White                                               | 2,873                           | 89.4 | 926                                                      | 88.4 | 342                                                     | 88.4 |
| Non-white                                           | 341                             | 6.0  | 121                                                      | 6.1  | 45                                                      | 11.6 |
| <b>Region</b>                                       |                                 |      |                                                          |      |                                                         |      |
| Midwest                                             | 434                             | 13.5 | 135                                                      | 12.9 | 51                                                      | 13.2 |
| Northeast                                           | 725                             | 22.6 | 214                                                      | 20.4 | 78                                                      | 20.2 |
| South                                               | 779                             | 24.2 | 278                                                      | 26.6 | 98                                                      | 25.3 |
| West                                                | 1,276                           | 39.7 | 420                                                      | 40.1 | 160                                                     | 41.3 |
| <b>Part D Low-Income Subsidy Status</b>             |                                 |      |                                                          |      |                                                         |      |
| None                                                | 2,306                           | 71.7 | 778                                                      | 74.3 | 294                                                     | 76.0 |
| Full or Partial                                     | 908                             | 27.2 | 269                                                      | 24.7 | 93                                                      | 24.0 |
| <b>Specific comorbidities</b>                       |                                 |      |                                                          |      |                                                         |      |
| Cognitive                                           | 758                             | 23.6 | 181                                                      | 17.3 | 60                                                      | 15.5 |
| Cardiovascular                                      | 2,609                           | 81.2 | 826                                                      | 74.3 | 300                                                     | 77.5 |
| Infection                                           | 329                             | 10.2 | 79                                                       | 7.5  | 23                                                      | 5.9  |
| Musculoskeletal                                     | 1,034                           | 32.2 | 319                                                      | 27.4 | 108                                                     | 27.9 |
| Renal failure                                       | 175                             | 5.4  | 49                                                       | 4.7  | 14                                                      | 3.6  |
| Anemia/Thrombocytopenia                             | 964                             | 30.0 | 314                                                      | 27.4 | 115                                                     | 29.7 |
| NCI comorbidity index, mean (SD)                    | 0.79                            | 1.2  | 0.65                                                     | 37.9 | 0.55                                                    | 36.2 |
| Claims-based disability status*                     | 500                             | 15.6 | 75                                                       | 74.3 | 20                                                      | 5.2  |
| <b>Year of CLL diagnosis</b>                        |                                 |      |                                                          |      |                                                         |      |
| 2007                                                | 648                             | 20.2 | 245                                                      | 23.4 | 118                                                     | 30.5 |
| 2008                                                | 684                             | 21.3 | 231                                                      | 22.1 | 87                                                      | 22.5 |
| 2009                                                | 662                             | 20.6 | 230                                                      | 22.0 | 91                                                      | 23.5 |
| 2010                                                | 640                             | 19.9 | 191                                                      | 18.2 | 56                                                      | 14.5 |
| 2011                                                | 580                             | 18.0 | 150                                                      | 14.3 | 35                                                      | 9.0  |
| <b>First-line treatment</b>                         |                                 |      |                                                          |      |                                                         |      |
| Chlorambucil only                                   | N/A                             |      | 163                                                      | 15.6 | 63                                                      | 16.3 |
| Rituximab only                                      | N/A                             |      | 268                                                      | 25.6 | 125                                                     | 32.3 |
| Rituximab containing chemoimmunotherapy combination | N/A                             |      | 510                                                      | 48.7 | 155                                                     | 40.0 |
| Other chemotherapy                                  | N/A                             |      | 106                                                      | 10.1 | 44                                                      | 11.4 |
| <b>Second-line treatment</b>                        |                                 |      |                                                          |      |                                                         |      |

|                                                                    |     |     |     |      |
|--------------------------------------------------------------------|-----|-----|-----|------|
| <b>Chlorambucil only</b>                                           | N/A | N/A | 35  | 9.0  |
| <b>Rituximab only</b>                                              | N/A | N/A | 118 | 30.5 |
| <b>Rituximab containing<br/>chemoimmunotherapy<br/>combination</b> | N/A | N/A | 158 | 40.8 |
| <b>Other chemotherapy</b>                                          | N/A | N/A | 76  | 19.6 |

\*Claims-based prediction for disability status, a proxy measure for the Eastern Cooperative Oncology Group (ECOG) performance status scale

**Appendix Table 4. Multivariate Cox Regression Results for Overall and CLL-Specific Survival**

| Characteristics                                     | Overall Mortality from First-Line Treatment Date (N = 1,047) | Overall Mortality from Second-Line Treatment Date (N = 387) | CLL-Specific Mortality from First-Line Treatment Date (N = 1,047) | CLL-Specific Mortality from Second-Line Treatment Date (N = 387) |
|-----------------------------------------------------|--------------------------------------------------------------|-------------------------------------------------------------|-------------------------------------------------------------------|------------------------------------------------------------------|
| <b>Age, years</b>                                   |                                                              |                                                             |                                                                   |                                                                  |
| <75                                                 | Reference                                                    | Reference                                                   | Reference                                                         | Reference                                                        |
| ≥75                                                 | 1.81 (1.46 to 2.24)                                          | 1.53 (1.1 to 2.13)                                          | 1.81 (1.34 to 2.44)                                               | 1.86 (1.15 to 2.99)                                              |
| <b>Male</b>                                         | 1.56 (1.28 to 1.91)                                          | 1.47 (1.06 to 2.03)                                         | 1.42 (1.07 to 1.88)                                               | 1.40 (0.89 to 2.19)                                              |
| <b>Race</b>                                         |                                                              |                                                             |                                                                   |                                                                  |
| White                                               | Reference                                                    | Reference                                                   | Reference                                                         | Reference                                                        |
| Non-white                                           | 1.01 (0.74 to 1.38)                                          | 0.88 (0.53 to 1.47)                                         | 1.14 (0.75 to 1.75)                                               | 0.79 (0.37 to 1.66)                                              |
| <b>Region</b>                                       |                                                              |                                                             |                                                                   |                                                                  |
| Midwest                                             | 1.17 (0.85 to 1.60)                                          | 1.07 (0.64 to 1.77)                                         | 1.27 (0.84 to 1.92)                                               | 1.26 (0.66 to 2.41)                                              |
| Northeast                                           | 1.52 (1.18 to 1.96)                                          | 1.68 (1.13 to 2.51)                                         | 1.21 (0.83 to 1.75)                                               | 1.28 (0.69 to 2.38)                                              |
| South                                               | 1.08 (0.84 to 1.39)                                          | 1.06 (0.70 to 1.61)                                         | 1.05 (0.74 to 1.49)                                               | 1.33 (0.77 to 2.32)                                              |
| West                                                | Reference                                                    | Reference                                                   | Reference                                                         | Reference                                                        |
| <b>Part D Low-Income Subsidy status</b>             |                                                              |                                                             |                                                                   |                                                                  |
| None                                                | Reference                                                    | Reference                                                   | Reference                                                         | Reference                                                        |
| Full or partial                                     | 1.31 (1.03 to 1.67)                                          | 1.33 (0.89 to 1.98)                                         | 1.21 (0.86 to 1.68)                                               | 1.32 (0.77 to 2.25)                                              |
| <b>NCI comorbidity score</b>                        | 1.15 (1.05 to 1.27)                                          | 1.11 (0.94 to 1.30)                                         | 1.13 (0.99 to 1.29)                                               | 1.18 (0.96 to 1.46)                                              |
| Disabled                                            | 1.66 (1.16 to 2.37)                                          | 1.68 (0.83 to 3.42)                                         | 1.62 (0.99 to 2.65)                                               | 1.83 (0.72 to 4.63)                                              |
| <b>Comorbidities</b>                                |                                                              |                                                             |                                                                   |                                                                  |
| Anemia/thrombocytopenia                             | 1.00 (0.80 to 1.24)                                          | 1.07 (0.74 to 1.55)                                         | 1.01 (0.75 to 1.37)                                               | 1.09 (0.65 to 1.81)                                              |
| Cognitive                                           | 1.03 (0.79 to 1.34)                                          | 0.77 (0.49 to 1.23)                                         | 1.04 (0.73 to 1.50)                                               | 0.53 (0.27 to 1.07)                                              |
| Cardiovascular                                      | 1.31 (1.00 to 1.71)                                          | 1.11 (0.73 to 1.68)                                         | 1.37 (0.94 to 2.00)                                               | 1.17 (0.66 to 2.07)                                              |
| Infection                                           | 1.04 (0.73 to 1.48)                                          | 1.20 (0.64 to 2.23)                                         | 1.09 (0.68 to 1.75)                                               | 1.58 (0.73 to 3.44)                                              |
| Musculoskeletal                                     | 1.24 (0.79 to 1.94)                                          | 0.66 (0.45 to 0.98)                                         | 0.80 (0.59 to 1.08)                                               | 0.64 (0.37 to 1.12)                                              |
| Renal failure                                       | 1.25 (0.80 to 1.97)                                          | 1.23 (0.50 to 3.03)                                         | 0.92 (0.45 to 1.85)                                               | 0.40 (0.05 to 3.27)                                              |
| Time to treatment (months)                          | 1.00 (0.99 to 1.01)                                          | 1.01 (1.00 to 1.02)                                         | 0.98 (0.97 to 0.99)                                               | 0.98 (0.96 to 1.00)                                              |
| <b>First line treatment group</b>                   |                                                              |                                                             |                                                                   |                                                                  |
| Chlorambucil only                                   | Reference                                                    | Reference                                                   | Reference                                                         | Reference                                                        |
| Rituximab only                                      | 0.69 (0.51 to 0.91)                                          | 0.96 (0.58 to 1.60)                                         | 0.56 (0.38 to 0.84)                                               | 0.92 (0.44 to 1.90)                                              |
| Rituximab containing chemoimmunotherapy combination | 0.64 (0.49 to 0.84)                                          | 1.39 (0.85 to 2.27)                                         | 0.64 (0.44 to 0.92)                                               | 1.74 (0.89 to 3.41)                                              |
| Other chemotherapy                                  | 0.86 (0.61 to 1.21)                                          | 1.19 (0.66 to 2.16)                                         | 0.90 (0.57 to 1.42)                                               | 1.14 (0.50 to 2.57)                                              |
| <b>Second line treatment group</b>                  |                                                              |                                                             |                                                                   |                                                                  |
| Chlorambucil only                                   | N/A                                                          | Reference                                                   | N/A                                                               | Reference                                                        |
| Rituximab only                                      | N/A                                                          | 0.73 (0.39 to 1.35)                                         | N/A                                                               | 0.70 (0.30 to 1.61)                                              |
| Rituximab containing chemoimmunotherapy combination | N/A                                                          | 1.00 (0.54 to 1.85)                                         | N/A                                                               | 1.10 (0.48 to 2.49)                                              |
| Other chemotherapy                                  | N/A                                                          | 1.41 (0.75 to 2.63)                                         | N/A                                                               | 1.79 (0.80 to 4.03)                                              |
| <b>Year of diagnosis</b>                            |                                                              |                                                             |                                                                   |                                                                  |
| 2007                                                | Reference                                                    | Reference                                                   | Reference                                                         | Reference                                                        |
| 2008                                                | 1.05 (0.80 to 1.37)                                          | 1.31 (0.85 to 2.04)                                         | 0.89 (0.62 to 1.27)                                               | 1.01 (0.57 to 1.80)                                              |
| 2009                                                | 0.83 (0.63 to 1.11)                                          | 1.18 (0.74 to 1.88)                                         | 0.59 (0.40 to 0.87)                                               | 0.68 (0.36 to 1.28)                                              |
| 2010                                                | 0.88 (0.64 to 1.21)                                          | 1.32 (0.75 to 2.31)                                         | 0.56 (0.36 to 0.87)                                               | 0.73 (0.35 to 1.54)                                              |
| 2011                                                | 0.71 (0.47 to 1.06)                                          | 2.16 (1.12 to 4.15)                                         | 0.35 (0.19 to 0.65)                                               | 0.66 (0.22 to 1.99)                                              |
